# Supplementary material for: A moderate method for in situ growing Fe-based LDHs on Ni foam for catalyzing the oxygen evolution reaction
Source: Royal Society of Chemistry journal article supplement (doi:10.1039/d3nr04589g), 2023-01-01
Supplement: d3nr04589g1.pdf [file d3nr04589g1.pdf]

## Supporting Information

A moderate method for in-situ growing Fe-based LDHs on Ni foam for catalyzing the oxygen evolution reaction

Yanqi Liu, Chenghao Zhang, Qingsong Cai, Jianmin Zhang\*, Zongmin Zheng\*

National Engineering Research Center for Intelligent Electrical Vehicle Power System, College of Mechanical and Electrical Engineering, Qingdao University, Qingdao, 266071, China.

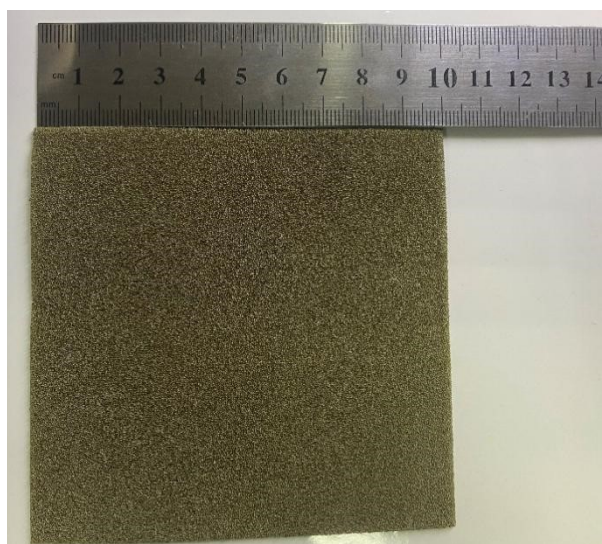

**Fig. S1.** Digital photograph of NiFe-LDH@NF.

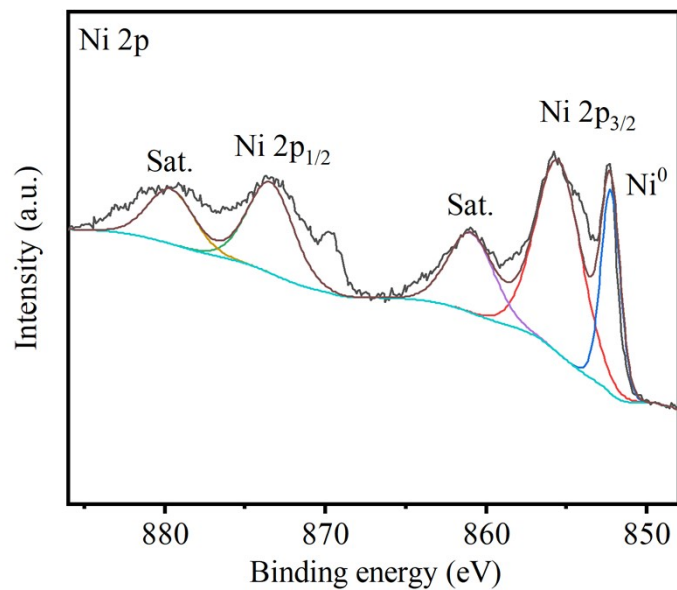

**Fig. S2.** Ni 2p X-ray photoelectron spectroscopy (XPS) spectra of NF.

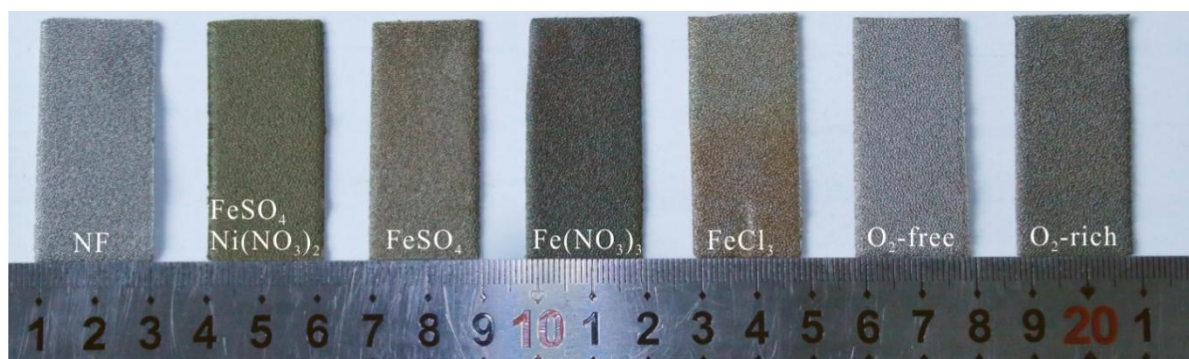

**Fig. S3.** The digital photographs of bare NF and NF treated by immersion in  $\text{FeSO}_4/\text{Ni}(\text{NO}_3)_2$ ,  $\text{FeSO}_4$ ,  $\text{Fe}(\text{NO}_3)_3$ ,  $\text{FeCl}_3$ ,  $\text{O}_2$ -free and  $\text{O}_2$ -rich  $\text{FeSO}_4/\text{Ni}(\text{NO}_3)_2$  solution.

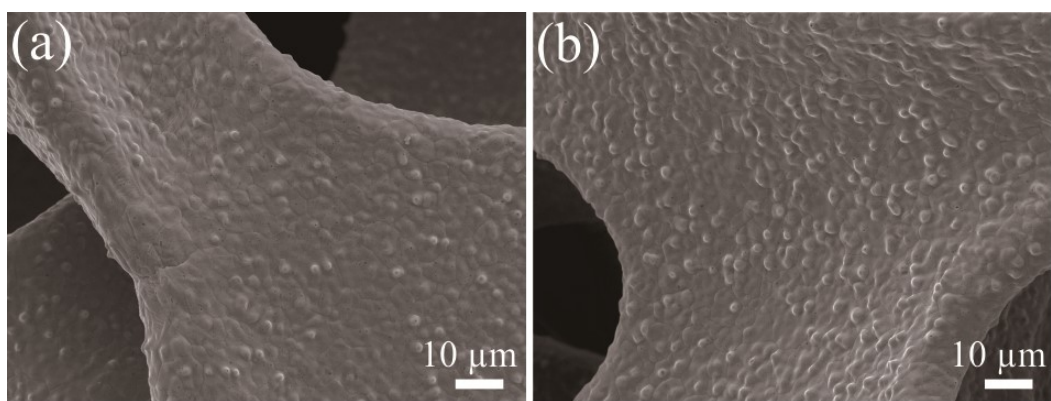

**Fig. S4.** SEM images of nickel foam in (a)  $\text{Ni}(\text{CH}_3\text{COO})_2$ , (b)  $\text{NiCl}_2$ .

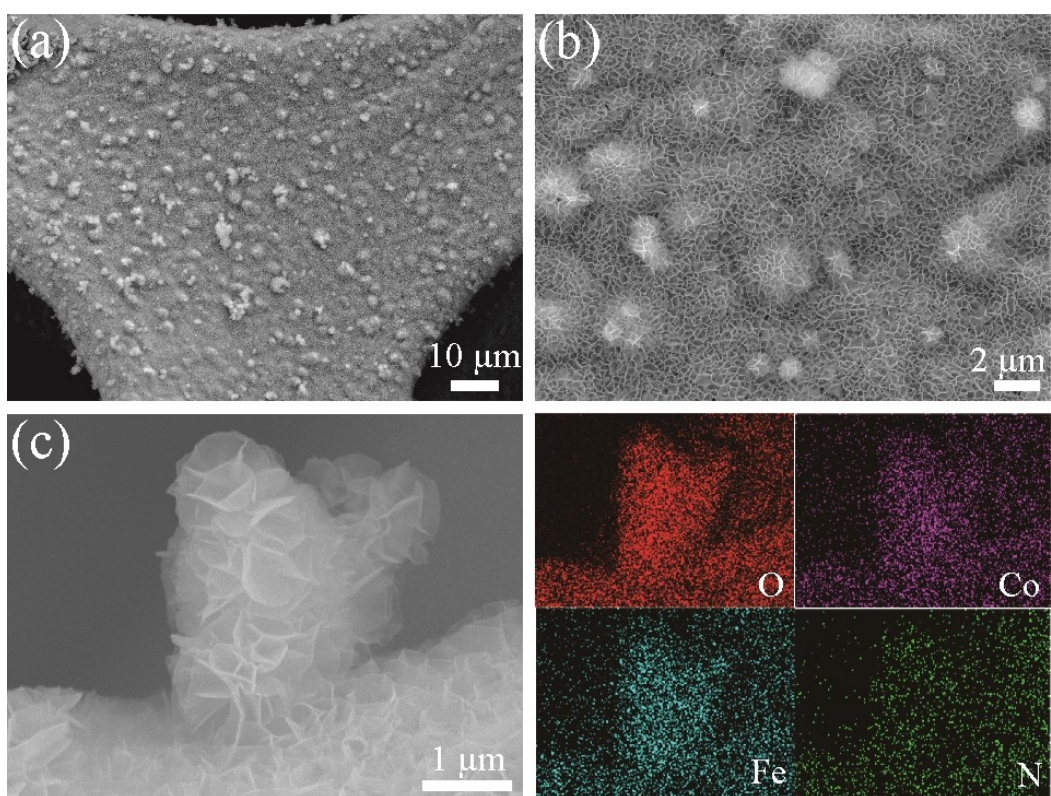

**Fig. S5.** SEM-EDS spectra of CoFe-LDH@NF.

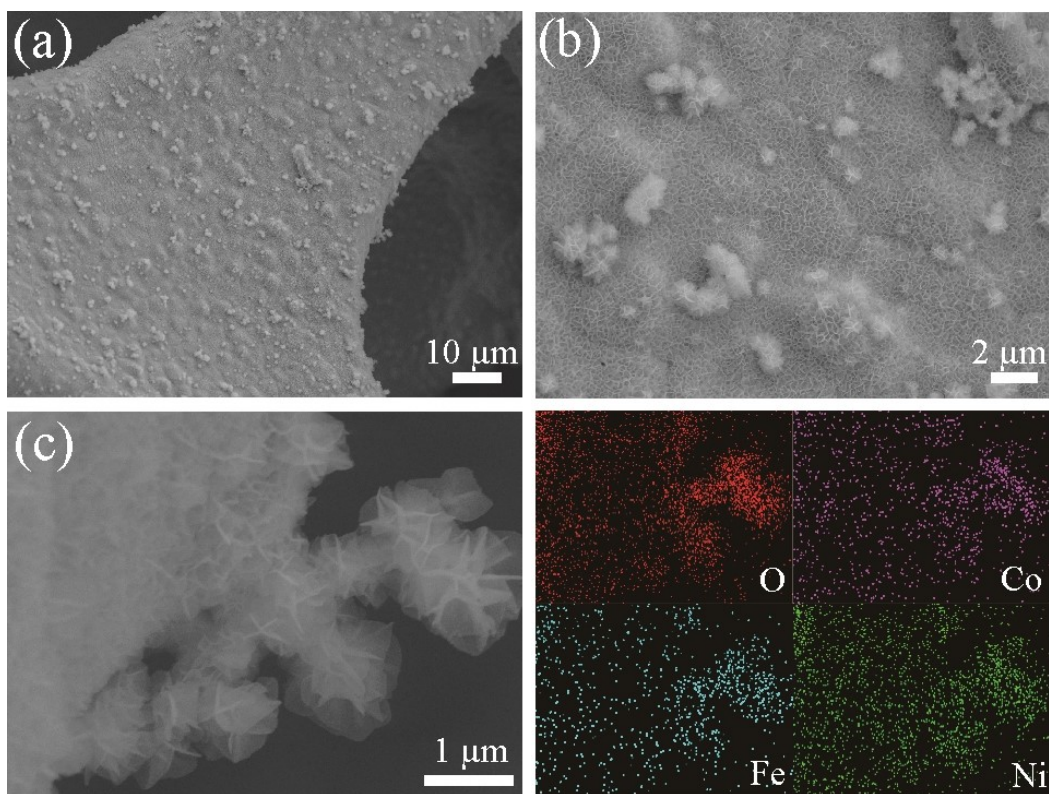

**Fig. S6.** SEM-EDS spectra of NiCoFe-LDH@NF.

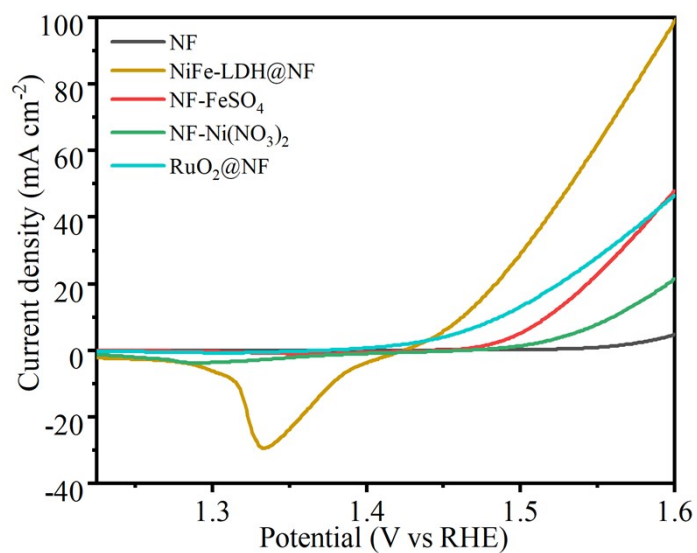

**Fig. S7.** The LSV curves for OER without iR compensation.

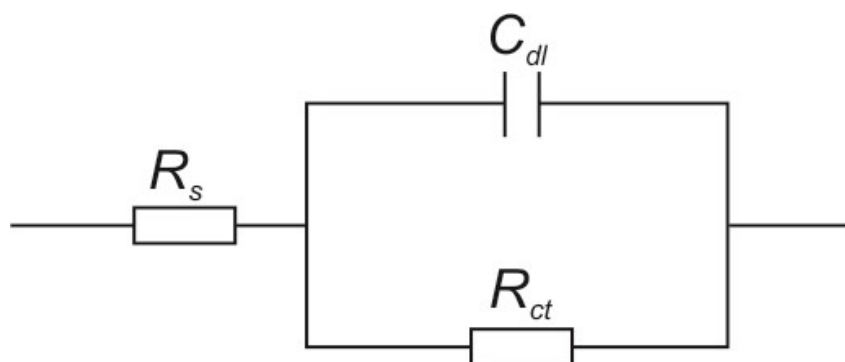

**Fig. S8.** EIS equivalent circuit diagram.

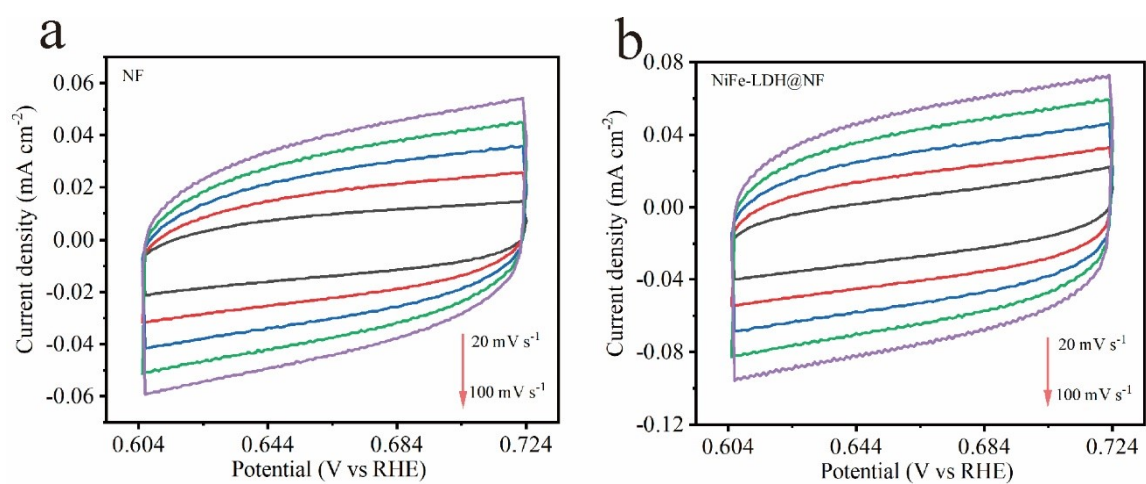

**Fig. S9.** CV curves of (a) NF, (b) NiFe-LDH@NF with different scan rates (20-100  $\text{mV s}^{-1}$ ) in 1 M KOH.

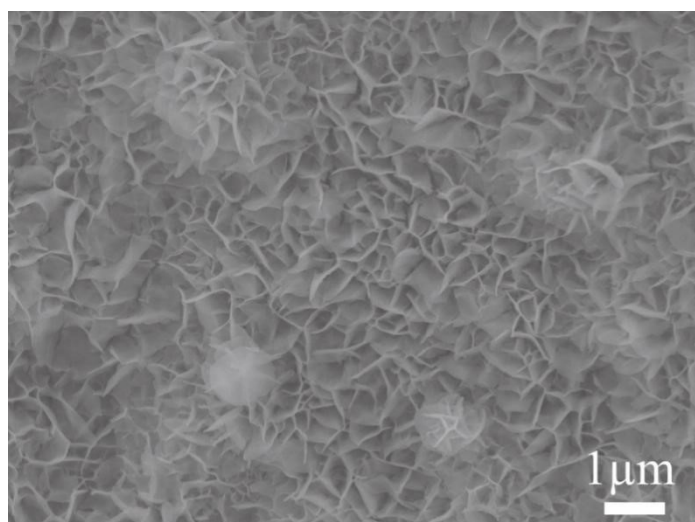

**Fig. S10.** SEM images of NiFe-LDH@NF after long-term testing.

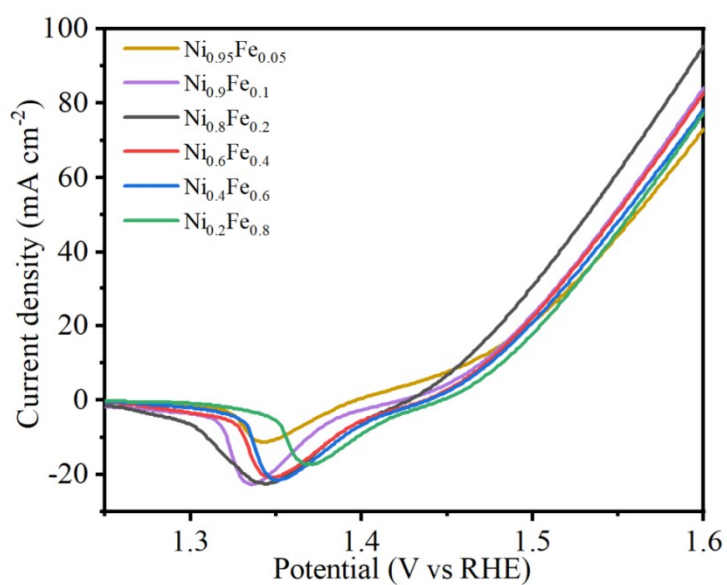

**Fig. S11.** The OER activities of NiFe-LDH@NF prepared in solutions with different Ni/Fe molar ratio

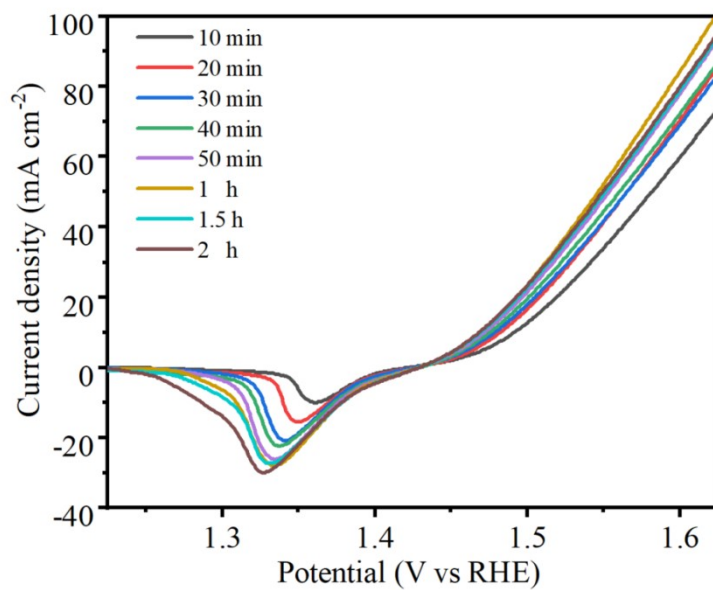

**Fig. S12.** The OER activities of different periods of NiFe-LDH@NF.

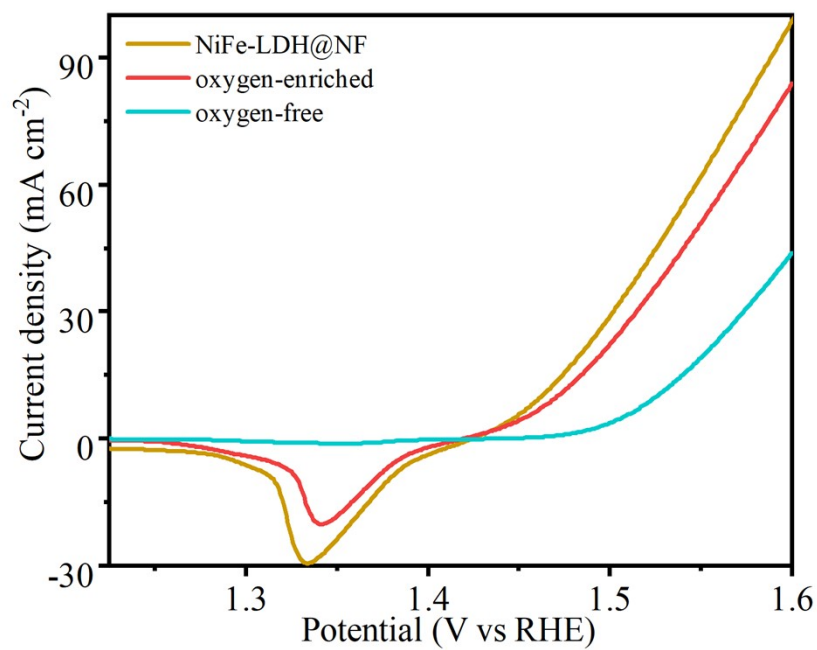

**Fig. S13.** The OER activities of NiFe-LDH@NF prepared in oxygen-enriched and oxygen-free Fe/Ni solutions.

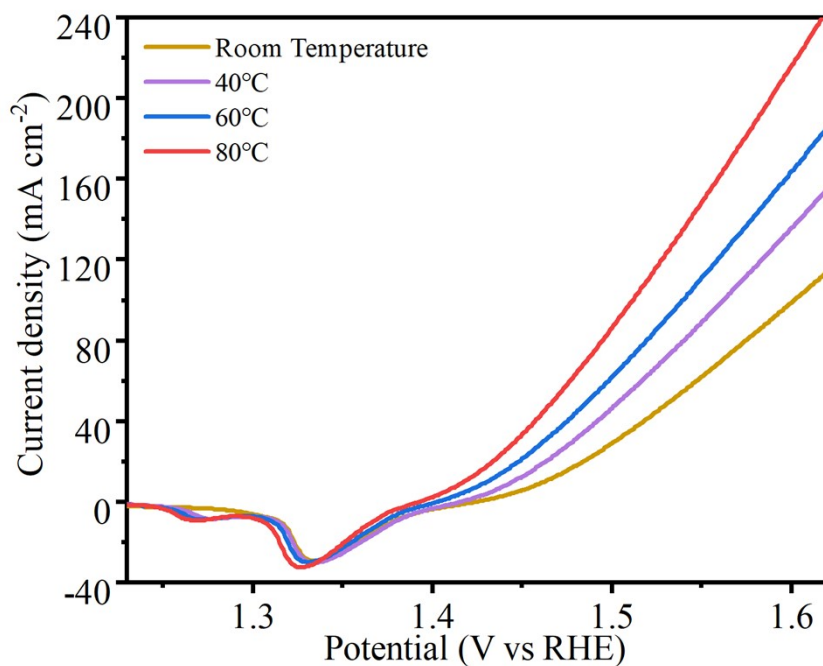

**Fig. S14.** OER electrocatalytic properties of different temperatures of NiFe-LDH@NF.

**Table S1.** Comparison of OER activity data for various catalysts.

| Materials       | OER <sub><math>\eta_{10}</math></sub> (mV) | OER <sub><math>\eta_{100}</math></sub> (mV) | Ref.             |
|-----------------|--------------------------------------------|---------------------------------------------|------------------|
| NiFe-LDH@NF     | 206                                        | 239                                         | This<br>Wor<br>k |
| NiFeCe-LDH@CP   | 232                                        | 267                                         | 1                |
| NiFeCo-LDH      | 249                                        | *                                           | 2                |
| NiFe-CuCoLDH    | 212                                        | 262                                         | 3                |
| NiFeLDH/C on NF | 210                                        | *                                           | 4                |



|                                                                      |     |     |    |
|----------------------------------------------------------------------|-----|-----|----|
| ex-Ir-Ni(OH) <sub>2</sub>                                            | 270 | *   | 5  |
| NiCo-LDH-10min                                                       | 250 | *   | 6  |
| NiFe@TiO <sub>2-x</sub>                                              | *   | 300 | 7  |
| Ni <sub>3</sub> Fe <sub>0.9</sub> Cr <sub>0.1</sub> /CACC            | 239 | 302 | 8  |
| S-FeOOH/IF                                                           | 244 | 308 | 9  |
| MoNiFe-27% (oxy)hydroxide                                            | 242 | 290 | 10 |
| NiCoP@NiMnLDH/NF                                                     | *   | 293 | 11 |
| Ni <sub>3</sub> S <sub>2</sub> @FeNi <sub>2</sub> S <sub>4</sub> @NF | 235 | 379 | 12 |
| FeIr/NF                                                              | 220 | *   | 13 |

---

Marked: CP, carbon paper; CACC, CO<sub>2</sub>-Activated carbon cloth; IF, iron foam.

## References

1. Y. Y. Liao, R. C. He, W. H. Pan, Y. Li, Y. Y. Wang, J. Li and Y. X. Li, *Chem. Eng. J.*, 2023, **464**, 142669.
2. Y. S. Park, J. Y. Jeong, M. J. Jang, C. Y. Kwon, G. H. Kim, J. Jeong, J. H. Lee, J. Y. Lee and S. M. Choi, *J. Energy Chem.*, 2022, **75**, 127-134.
3. L. Yu, J. Y. Xiao, C. Q. Huang, J. Q. Zhou, M. Qiu, Y. Yu, Z. F. Ren, C. W. Chu and J. C. Yu, *Proc. Natl. Acad. Sci. U. S. A.*, 2022, **119**, e2202382119.
4. Z. H. Zhang, C. L. Wang, X. L. Ma, F. Liu, H. Xiao, J. Zhang, Z. Lin and Z. P. Hao, *Small.*, 2021, **17**, 2103785.

5. J. L. Liu, J. X. Xiao, Z. Y. Wang, H. M. Yuan, Z. G. Lu, B. C. Luo, E. K. Tian and G. I. N. Waterhouse, *ACS Catal.*, 2021, **11**, 5386-5395.
6. H. M. Sun, Y. L. Miao, T. Wu and Q. Wang, *Chem. Commun.*, 2020, **56**, 872-875.
7. K. Zhang, T. T. Wan, H. Y. Wang, Y. H. Luo, Y. M. Shi, Z. S. Zhang, G. H. Liu and J. D. Li, *J. Colloid Interface Sci.*, 2023, **645**, 66-75.
8. J. F. Zheng, J. X. Zhang, L. H. Zhang, W. F. Zhang, X. J. Wang, Z. M. Cui, H. Y. Song, Z. X. Liang and L. Du, *ACS Appl. Mater. Interfaces.*, 2022, **14**, 19524-19533.
9. X. Chen, Q. C. Wang, Y. W. Cheng, H. L. Xing, J. Z. Li, X. J. Zhu, L. B. Ma, Y. T. Li and D. M. Liu, *Adv. Funct. Mater.*, 2022, **32**, 2112674.
10. Z. Y. He, J. Zhang, Z. H. Gong, H. Lei, D. Zhou, N. A. Zhang, W. J. Mai, S. J. Zhao and Y. Chen, *Nat. Commun.*, 2022, **13**, 2191.
11. P. Wang, J. Qi, X. Chen, C. Li, W. P. Li, T. H. Wang and C. H. Liang, *ACS Appl. Mater. Interfaces.*, 2020, **12**, 4385-4395.
12. Y. Y. Yang, H. X. Meng, C. Kong, S. H. Yan, W. X. Ma, H. Zhu, F. Q. Ma, C. J. Wang and Z. A. Hu, *J. Colloid Interface Sci.*, 2021, **599**, 300-312.
13. J. L. Chen, Y. M. Wang, G. F. Qian, T. Q. Yu, Z. L. Wang, L. Luo, F. Shen and S. B. Yin, *Chem. Eng. J.*, 2021, **421**, 129892.
